# Supplementary material for: The New Situation of Diatom Bloom in the Middle and Lower Reaches of Hanjiang River under River Chief System
Source: Copernicus journal article supplement (doi:10.5194/piahs-383-121-2020), 2020-09-16
Supplement: Supplementary file 1 [file DATA.xls]

## Sheet: Fig. 2
	algae density（104 cell/L）
	DATE	Shayang	Yuekou	Xiantao	Hanchuan	Zongguan
	2018-02-20	1540	2060	2580	2340	3000
	2018-02-21	1160	1840	2850	1900	3200
	2018-02-22	1140	1740	1820	2020	2740
	2018-02-23	1690	1940	2080	2530	2800
	2018-02-24	1436	1460	1355	1742	2420
	2018-02-25	1470	1540	1430	1750	2465
	2018-02-27	1668	2008	1845	2285	2560
	2018-02-28	1124	1540	1475	1896	1764
	2018-03-01	1280	1744	1780	2072	1820
	2018-03-02	888	1435	1840	2205	2090
	2018-03-03	660	845	1050	1660	1870
	2018-03-04	430	810	1198	950	1330
	2018-03-05	340	507	780	890	1235
	2018-03-06	284	500	550	585	650
	2018-03-07	172	305	360	460	500
	Fig. 2 The tendency chart of algal density in each cross section during the outbreak of diatom bloom
