# Supplementary material for: The New Situation of Diatom Bloom in the Middle and Lower Reaches of Hanjiang River under River Chief System
Source: Copernicus journal article supplement (doi:10.5194/piahs-383-121-2020), 2020-09-16
Supplement: Supplementary file 1 [file piahs-383-121-2020-supplement.zip]

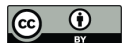

## *Supplement of*

# **The New Situation of Diatom Bloom in the Middle and Lower Reaches of Hanjiang River under River Chief System**

**Bao Qian et al.**

*Correspondence to:* Bao Qian (jacber@163.com)

- piahs-383-121-2020-supplement-title-page.pdf
- DATA.xls

The copyright of individual parts of the supplement might differ from the CC BY 4.0 License.
